# Supplementary material
Source: PubMed Central journal article supplement (PMC6527314)
Supplement: NIHMS1500249-supplement-SI_guide.pdf [file NIHMS1500249-supplement-SI_guide.pdf]

## **Supplementary Information**

**Supplementary Table S1.** CLL-IPAs and CD5+B-IPAs

**Supplementary Table S2.** Novel TSG candidates

**Supplementary Table S3.** Primer sequences

**Supplementary Figure 1.**

Contains gel source data for Fig. 2a, 2d, 3c, 4f, Extended Data Fig. 5, 6a-d, 7b, c, e-g, and the individual *P* values for Fig. 2e.
