# Supplementary material
Source: PubMed Central journal article supplement (PMC6527314)
Supplement: NIHMS1500249-supplement-Supplementary_Fig__1.pdf [file NIHMS1500249-supplement-Supplementary_Fig__1.pdf]

Figure 2a

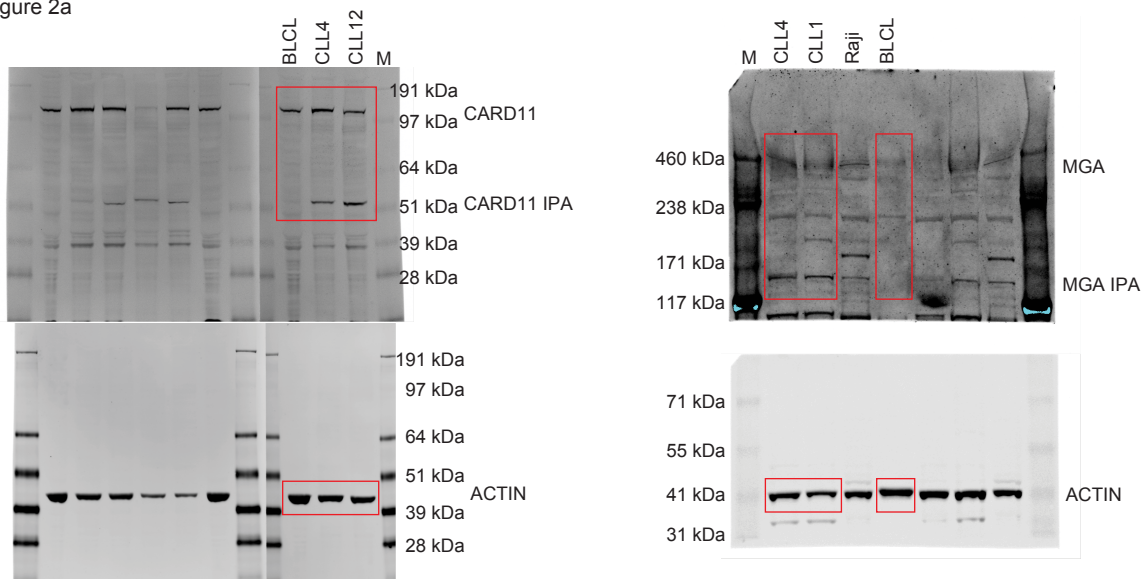

Figure 2d

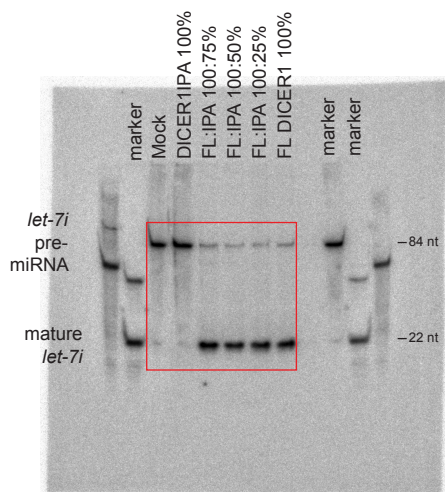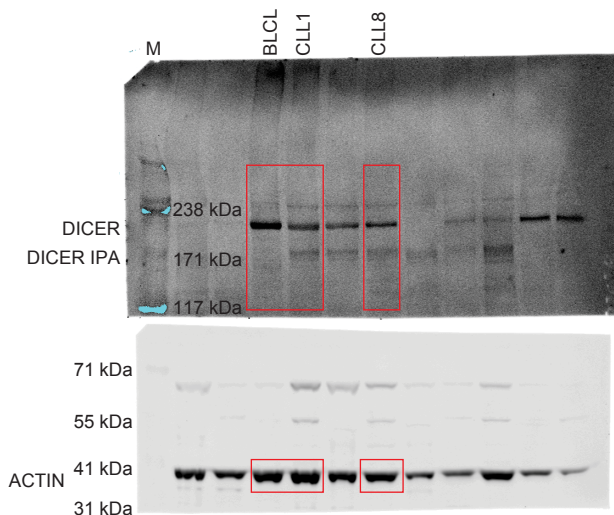

For all Western blot gels, the loading control (ACTIN) is from the same gel as the experimental one

Figure 2e

Individual P values obtained from two-sided t-test for independent samples of values shown in Fig. 2e.

|         | MGA IPA vs GFP | MGA FL vs GFP | Equal variance |
|---------|----------------|---------------|----------------|
| MYC     | 0.88           | 0.33          | yes            |
| TP53    | 0.70           | 0.07          | yes            |
| BLK     | 1E-4           | 6E-5          | yes            |
| ATF4    | 4E-8           | 0.003         | yes            |
| CDKN1B  | 1E-4           | 2E-5          | yes            |
| NME1    | 0.25           | 0.003         | yes            |
| HNRNPA1 | 0.21           | 8E-5          | yes            |
| MCM5    | 0.03           | 0.02          | yes            |
| CDC25A  | 0.03           | 9E-6          | yes            |
| BAX     | 0.04           | 0.02          | yes            |
| CDK4    | 0.003          | 0.01          | yes            |
| MCM4    | 0.008          | 9E-6          | yes            |

Figure 3b

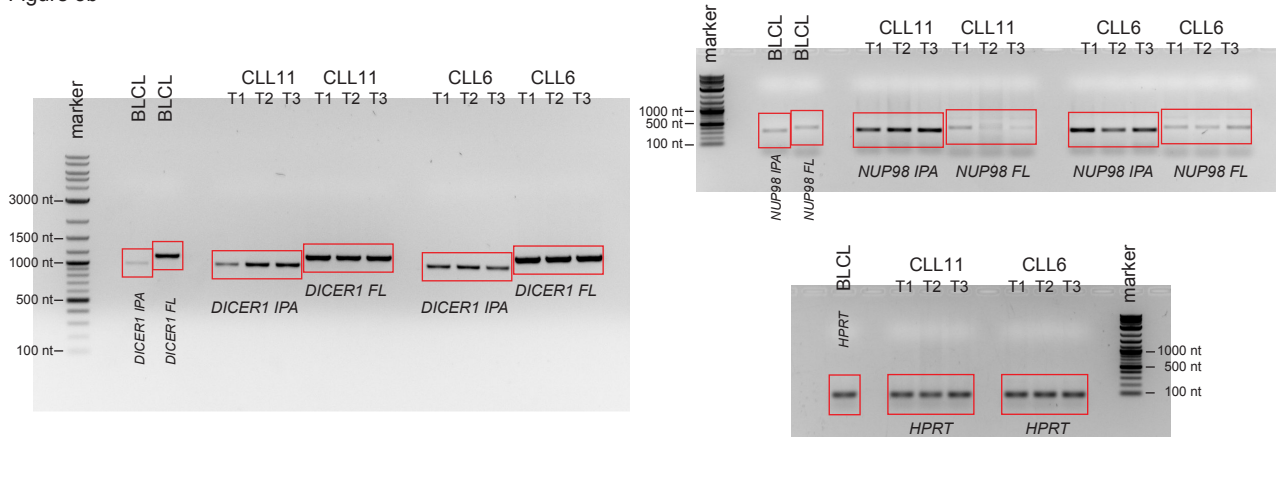

Figure 4f

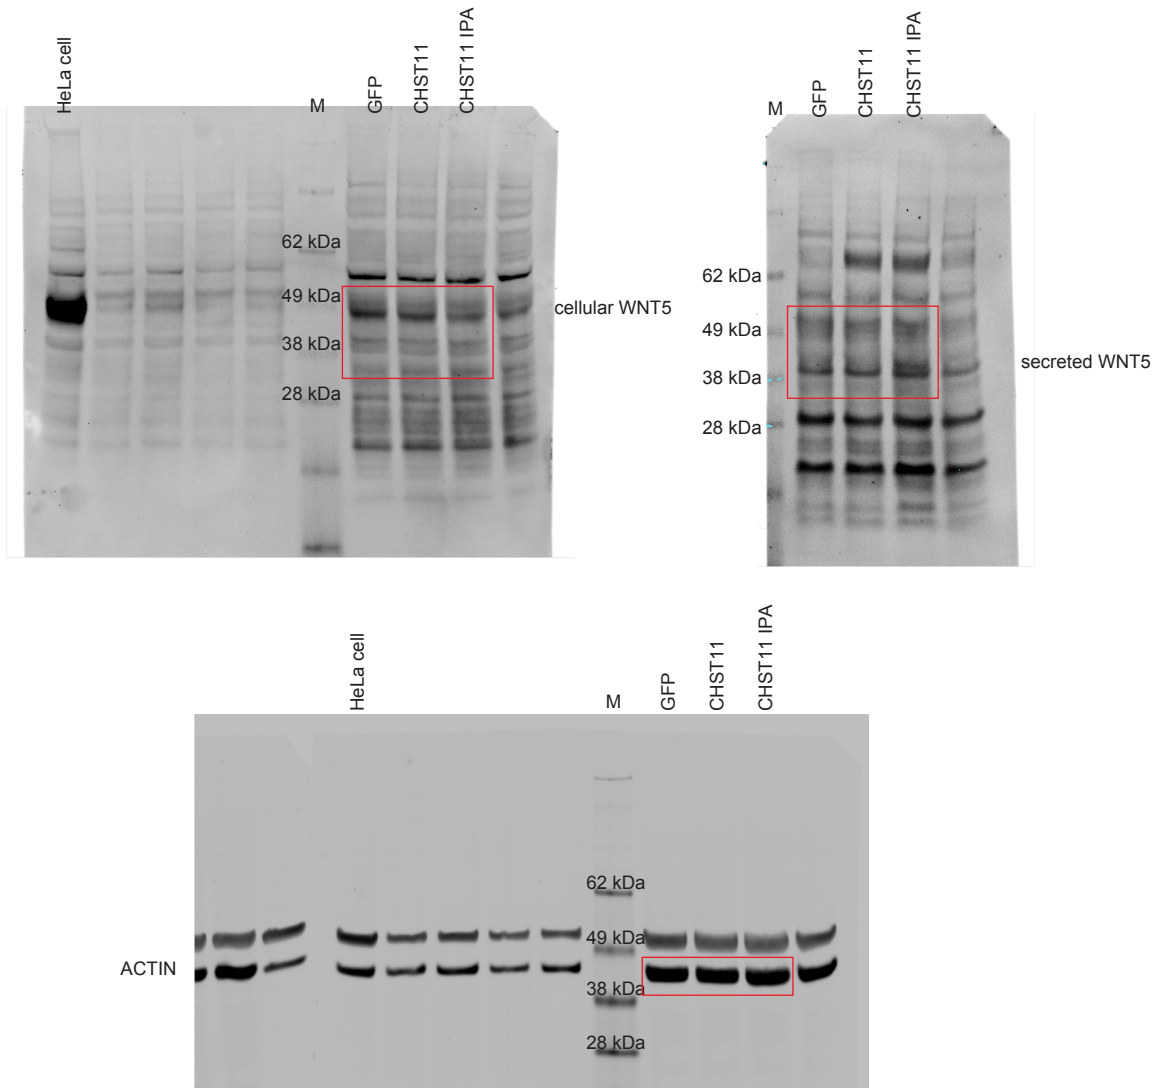

For all Western blot gels, the loading control (ACTIN) is from the same gel as the experimental one.

Extended Data Figure 4

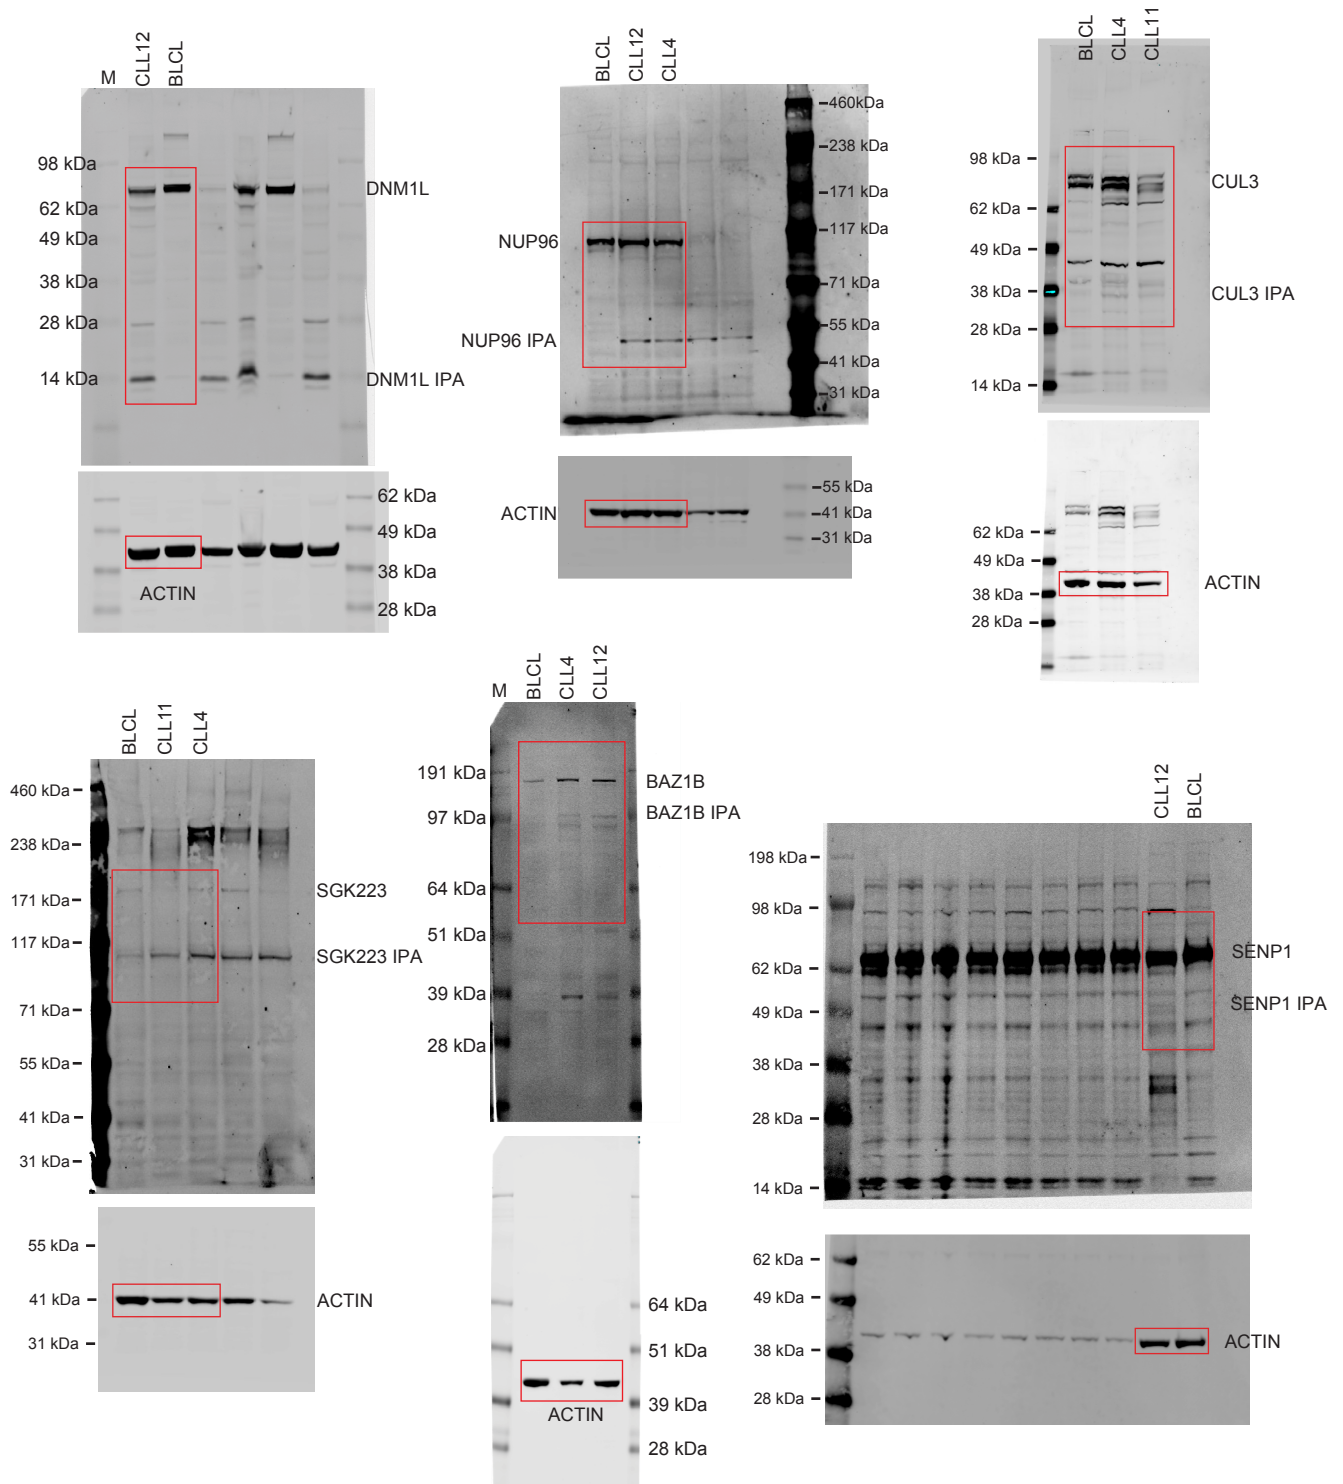

For all Western blot gels, the loading control (ACTIN) is from the same gel as the experimental one.

Extended Data Figure 4

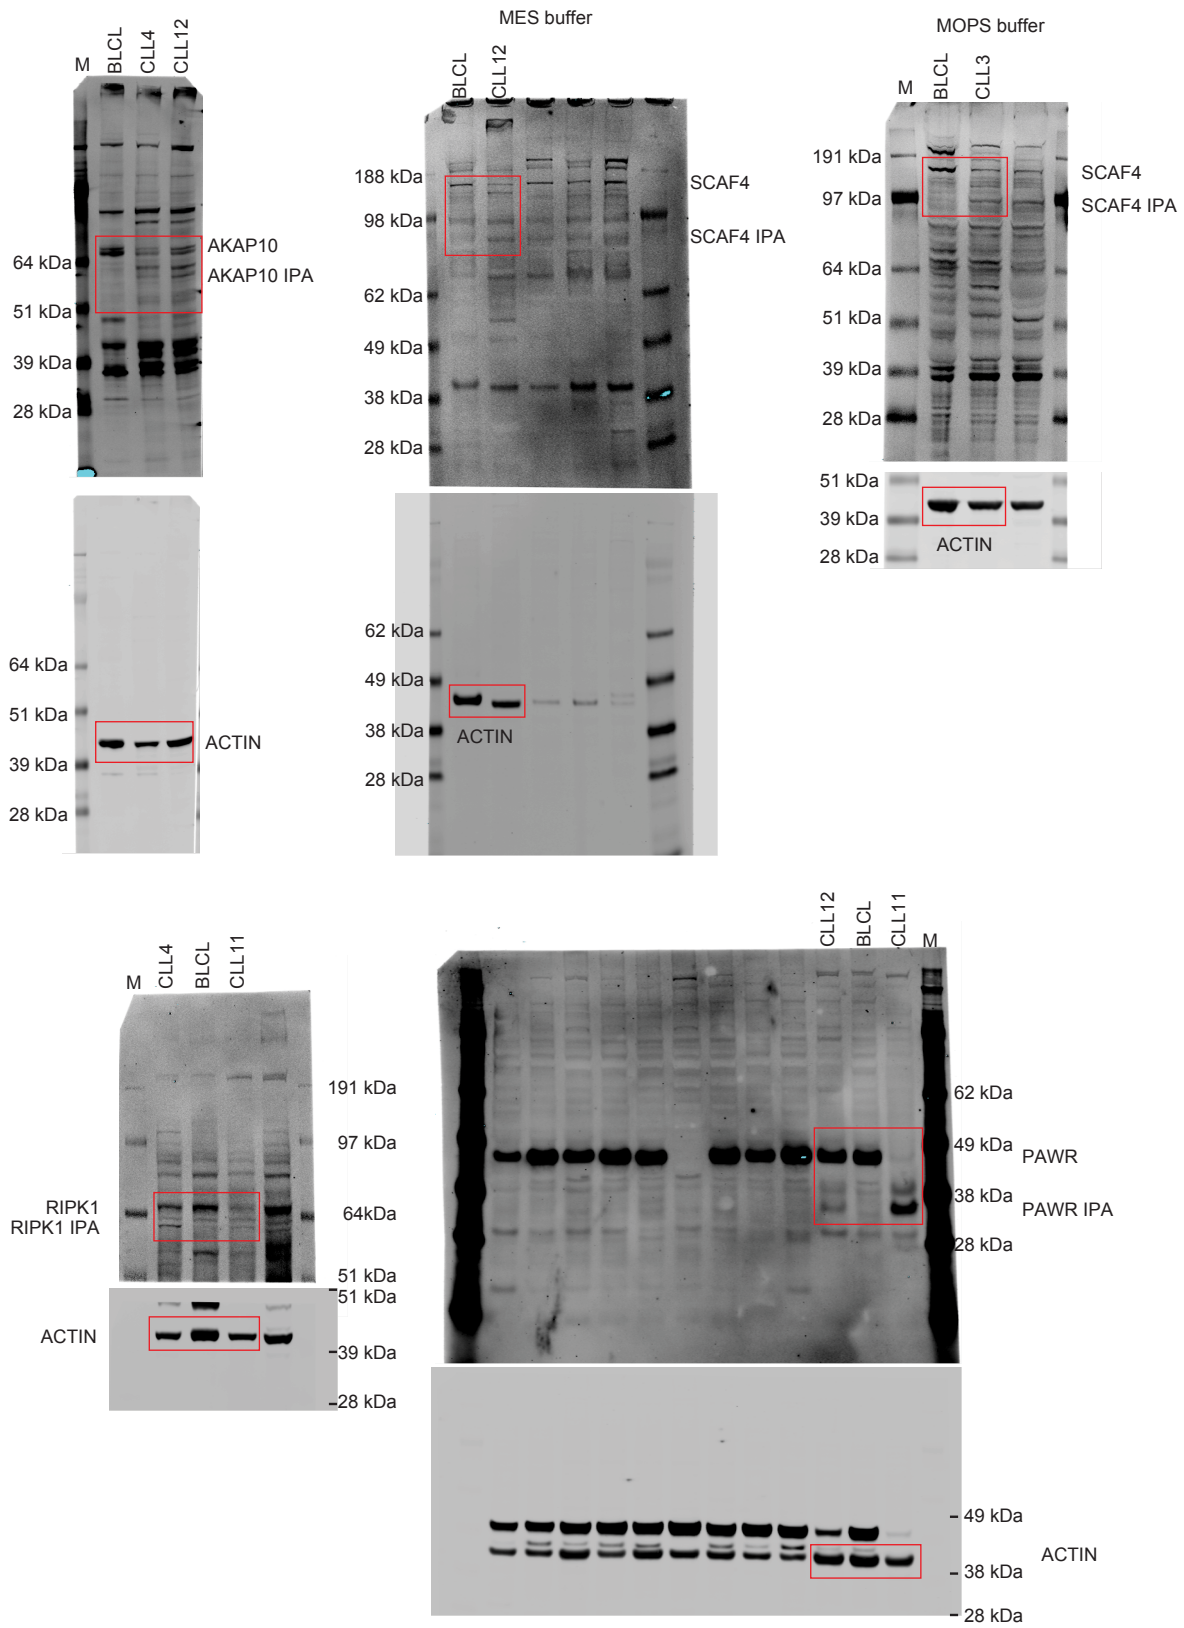

For all Western blot gels, the loading control (ACTIN) is from the same gel as the experimental one.

Extended Data 5a

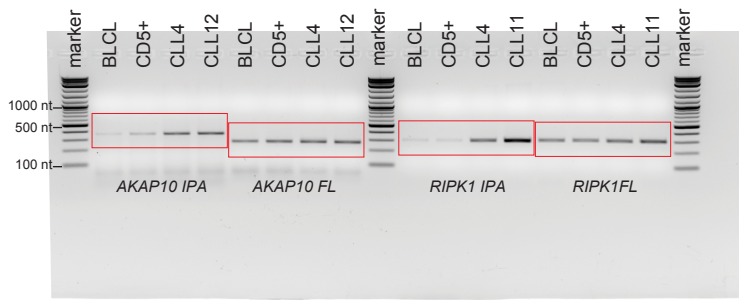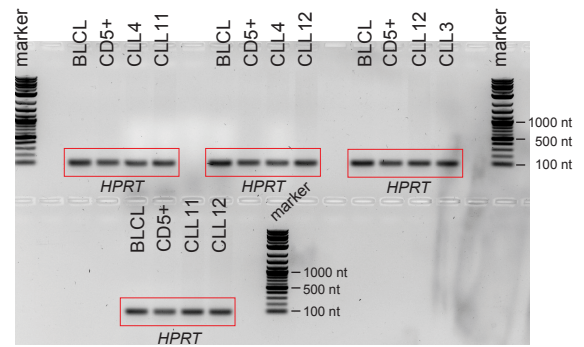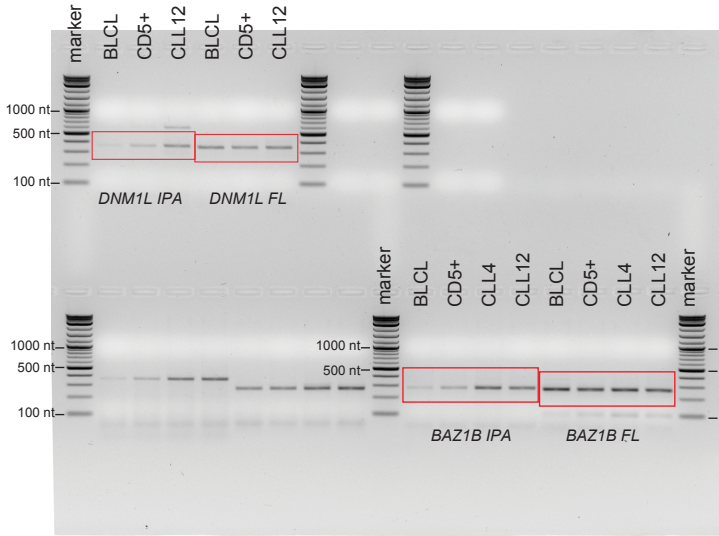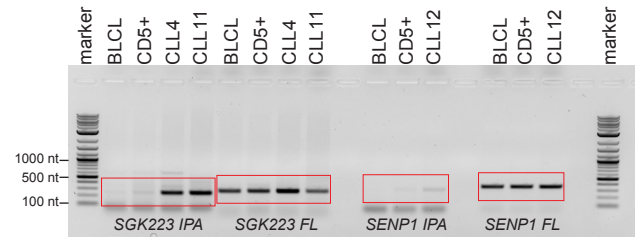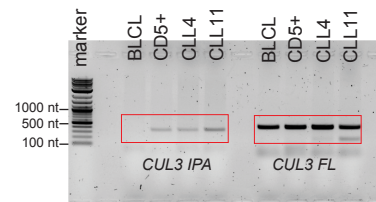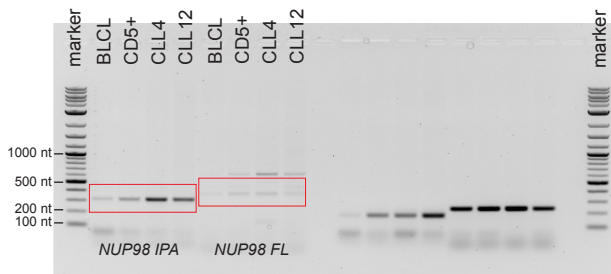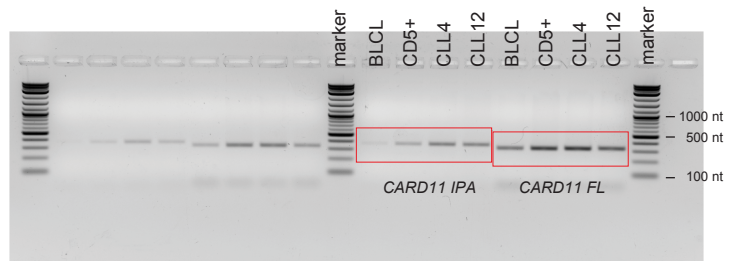

Extended Data 5a

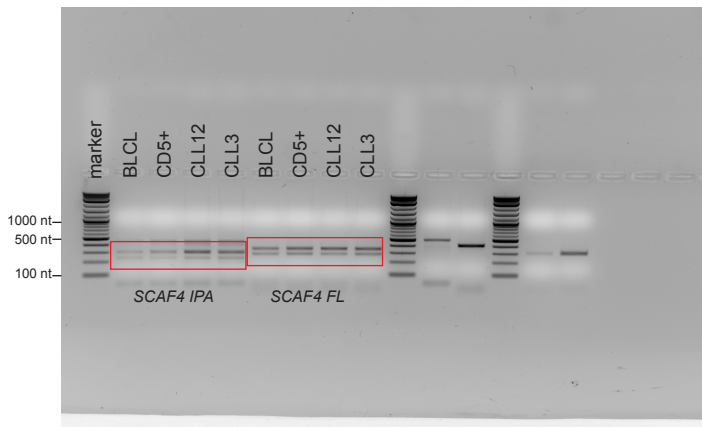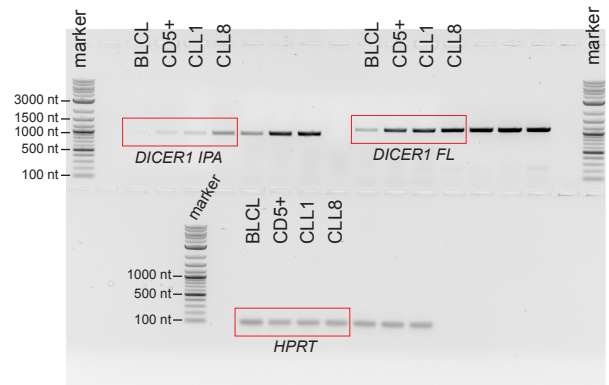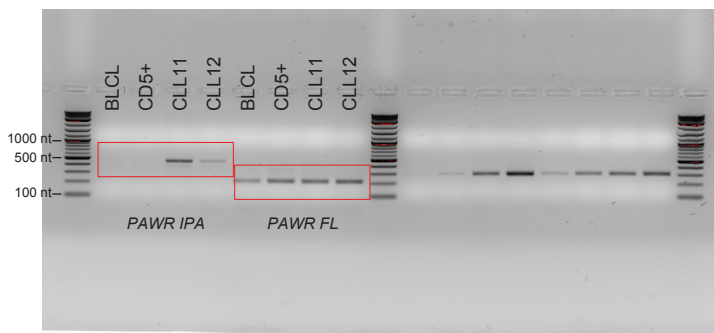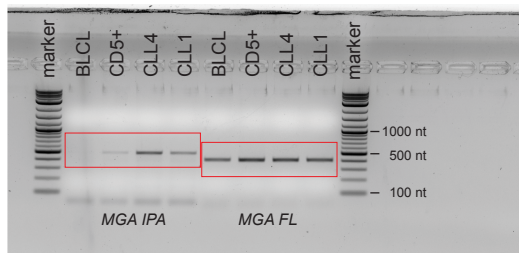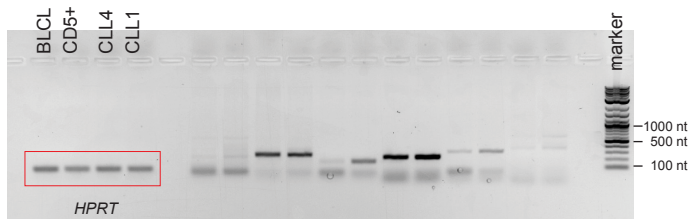

Extended Data Figure 5b

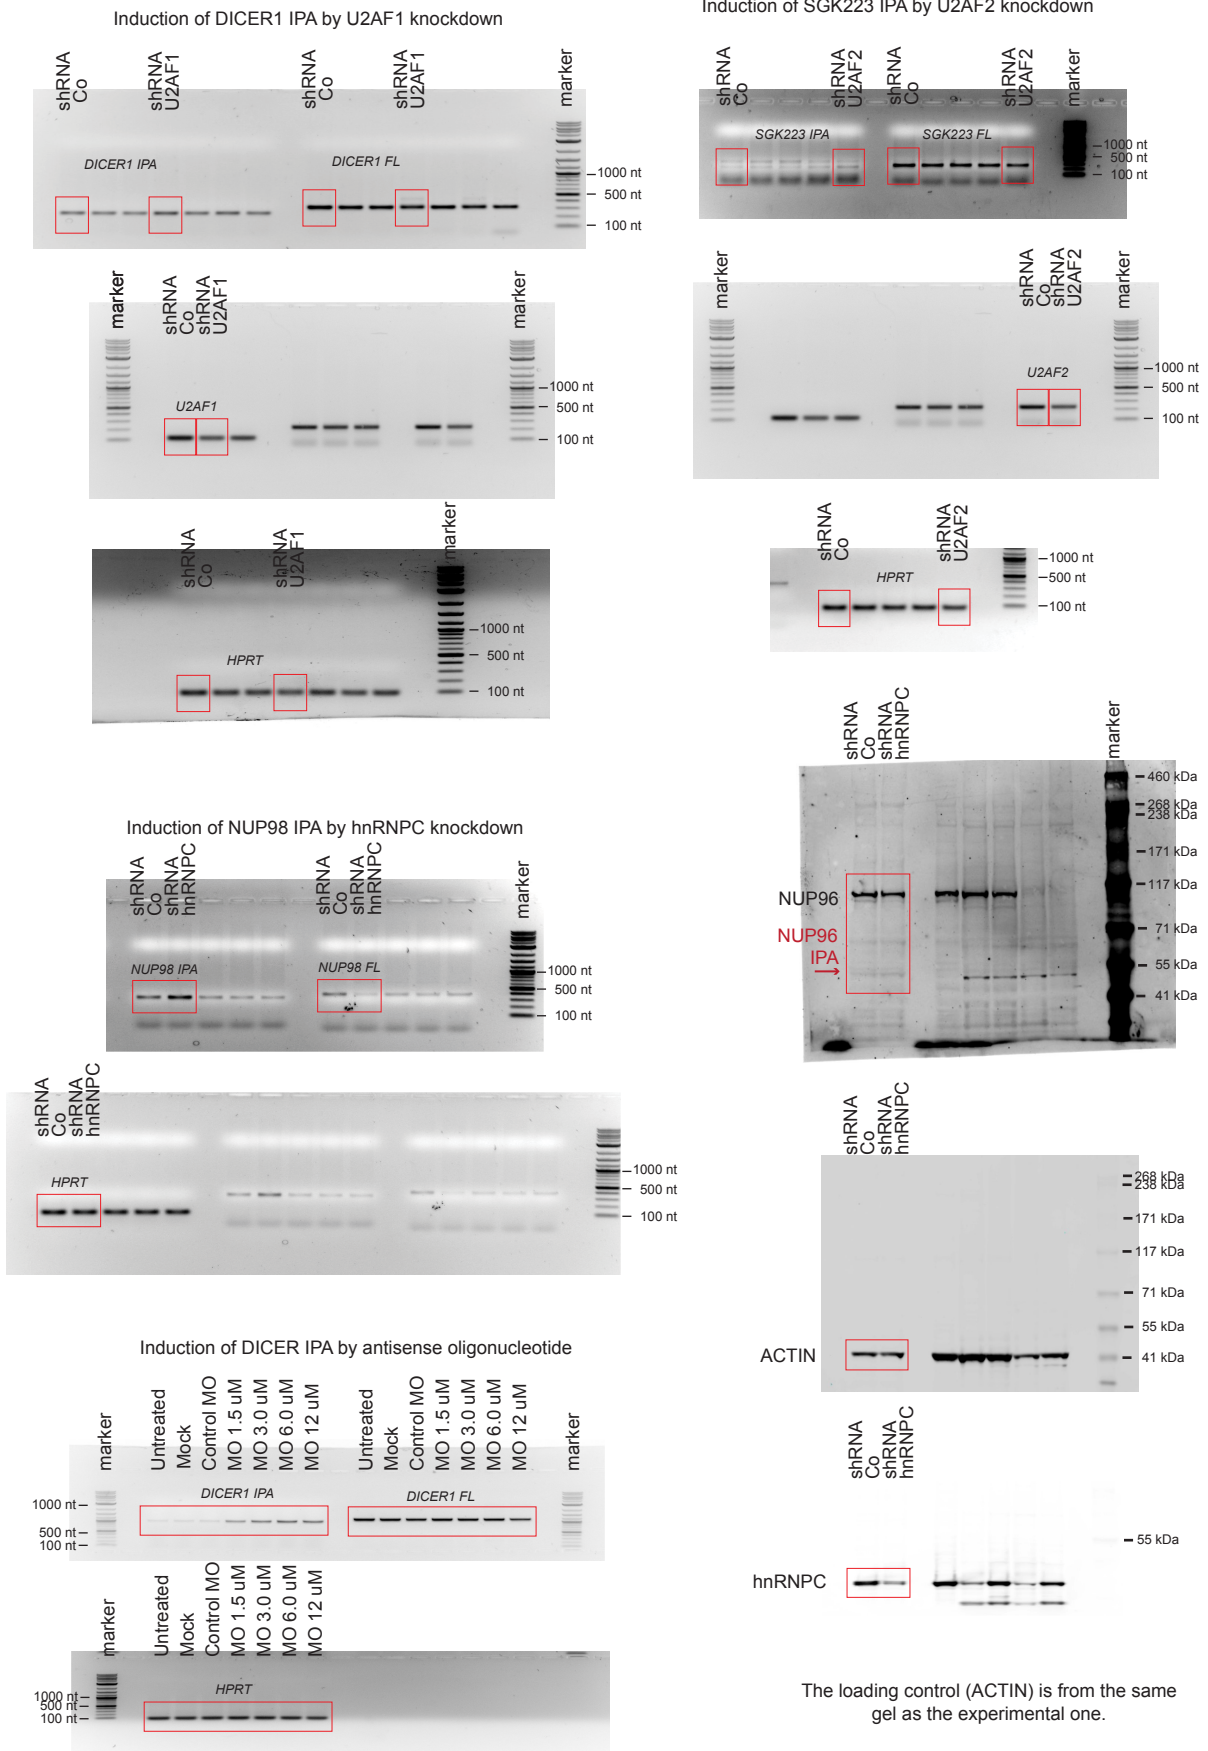

Extended Data Figure 5b

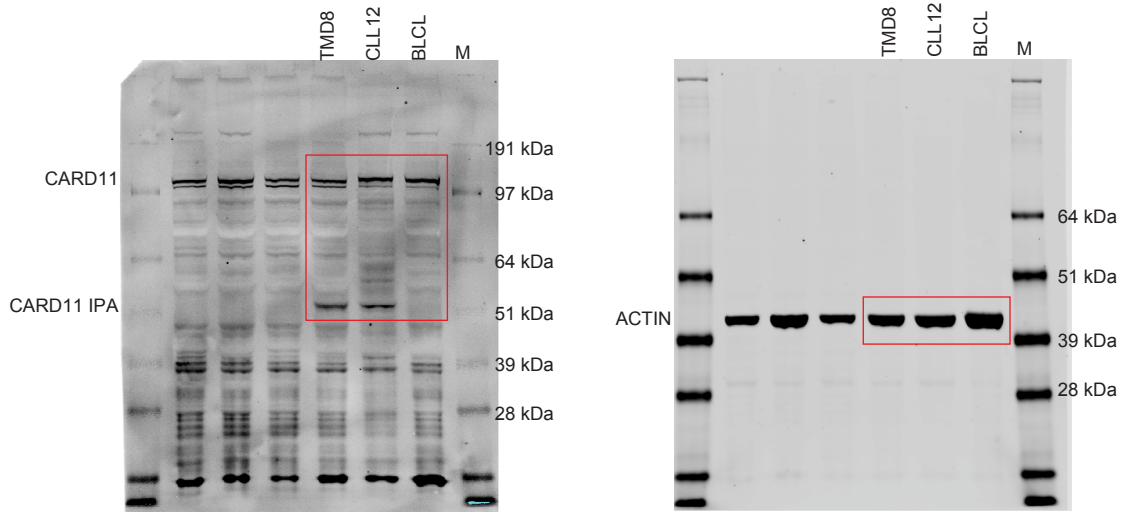

Extended Data Figure 5c

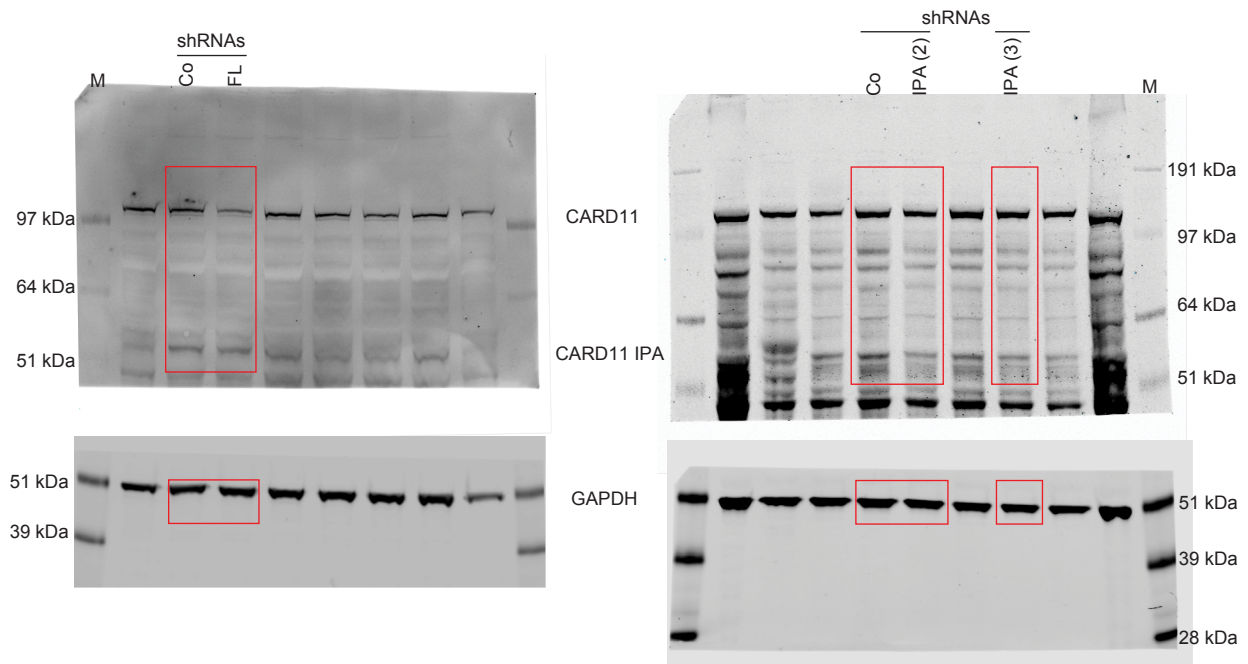

For all Western blot gels, the loading control (ACTIN/GAPDH) is from the same gel as the experimental one.



Extended Data Figure 5c

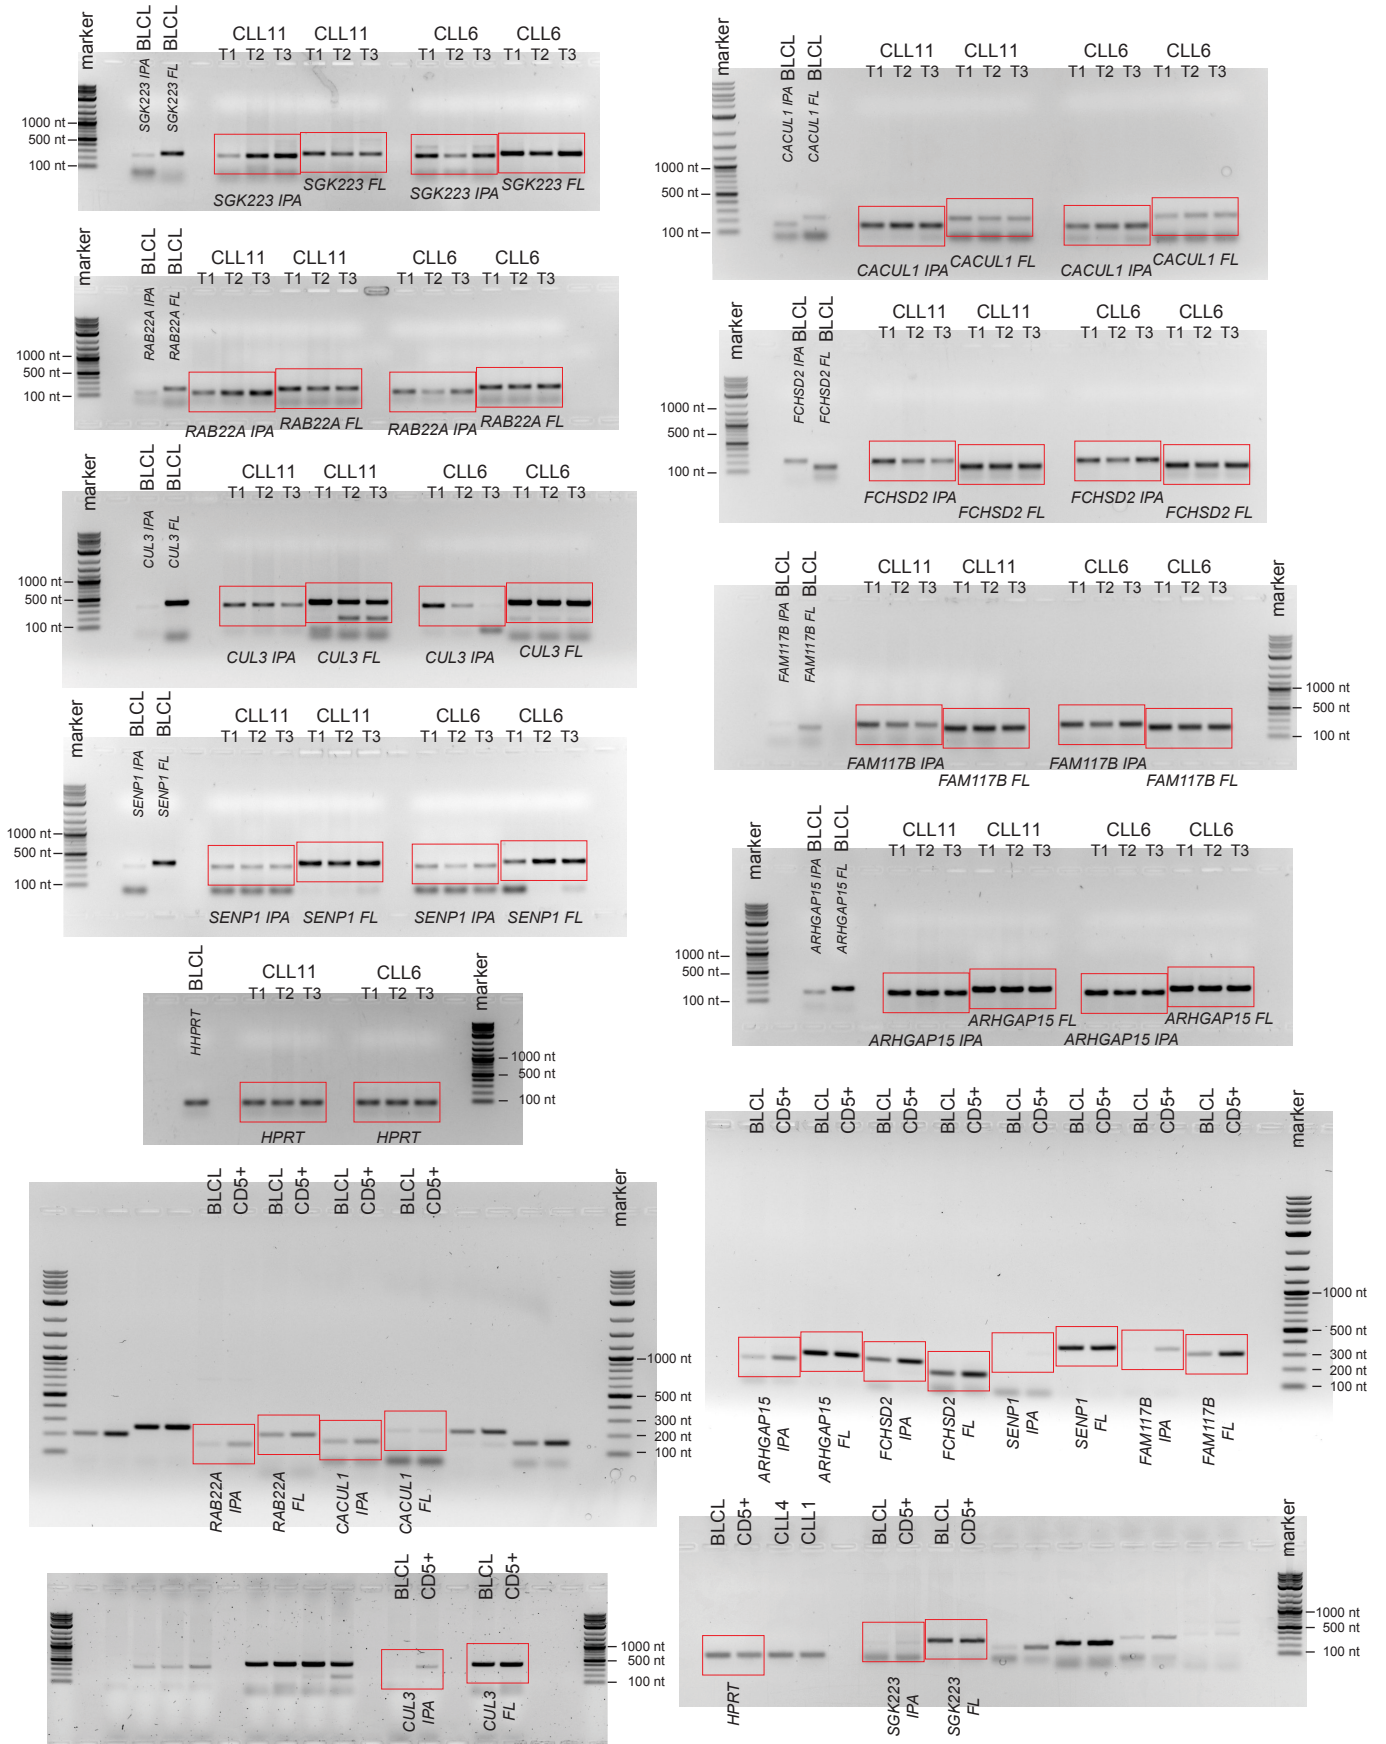

Extended Data Figure 5d

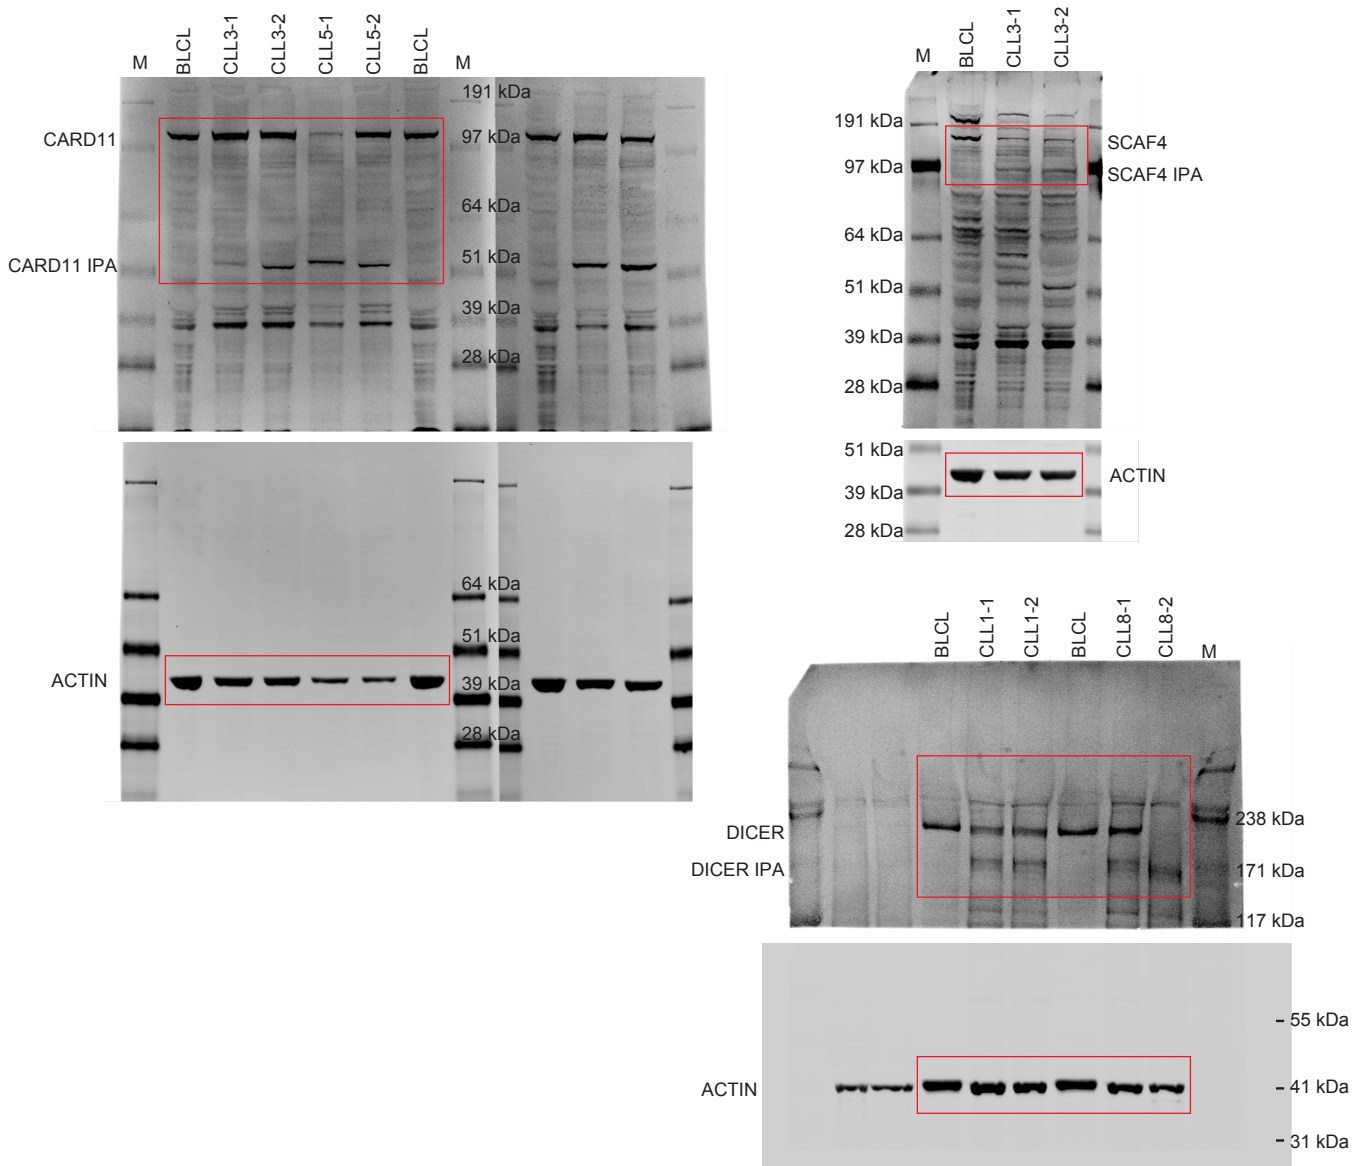

For all gels, the loading control (ACTIN) is from the same gel as the experimental one above it.

Extended Data Figure 6e

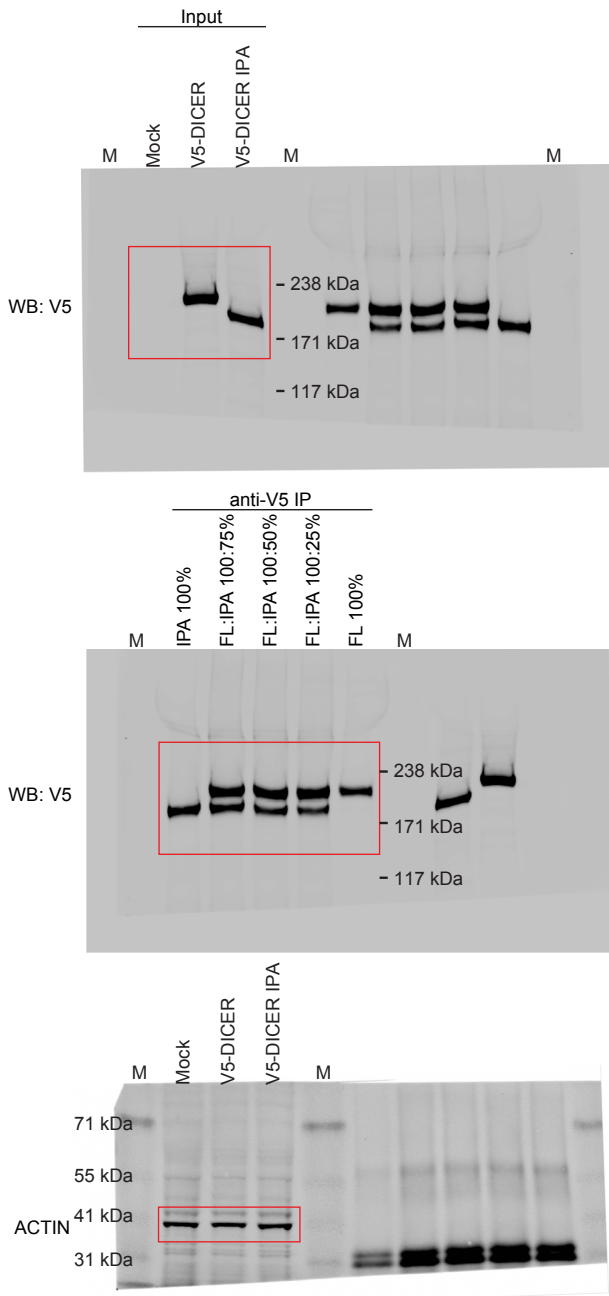

For all Western blot gels, the loading control (ACTIN) is from the same gel as the experimental one.

Extended Data Figure 6f

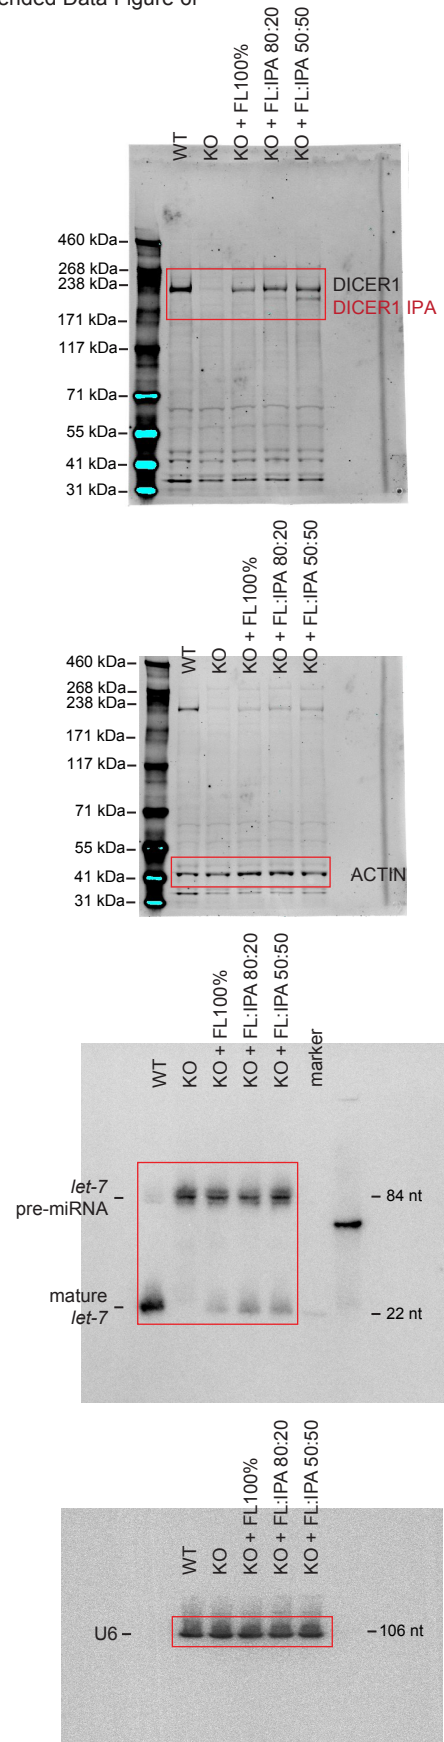

Extended Data Figure 6g

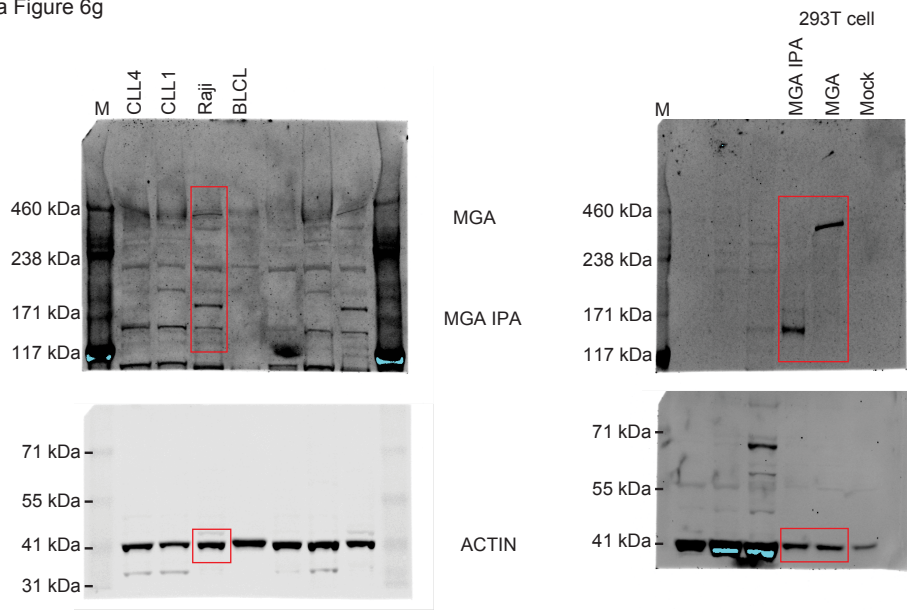

For all Western blot gels, the loading control (ACTIN) is from the same gel as the experimental one.

Extended Data Figure 8f

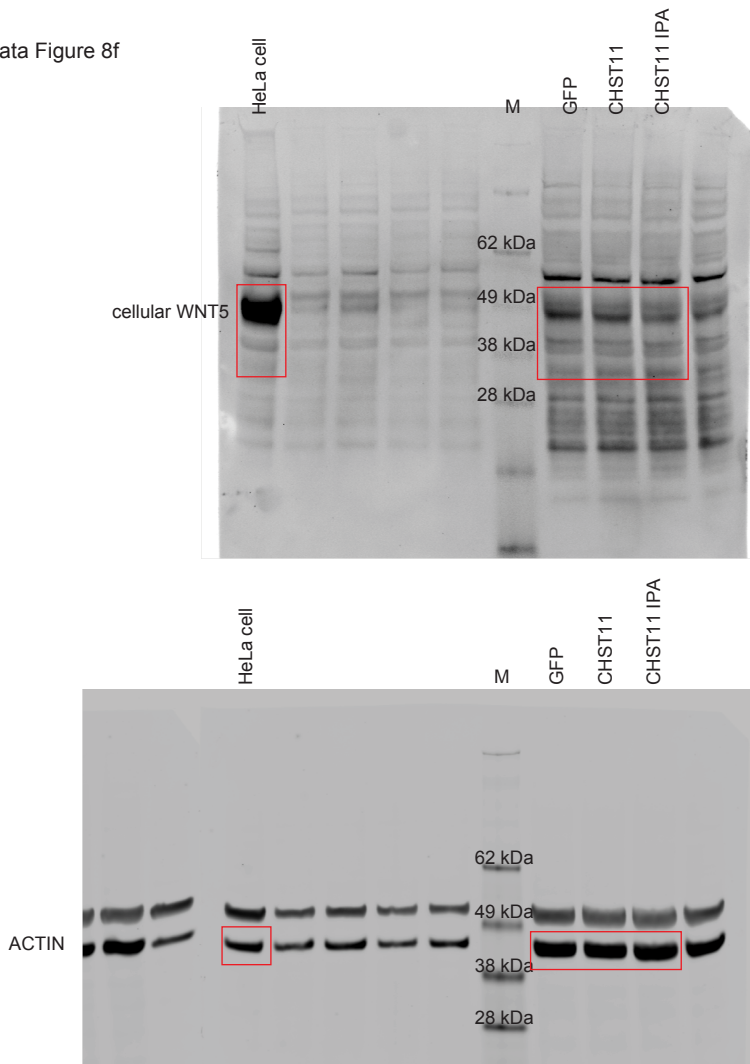

For all Western blot gels, the loading control (ACTIN) is from the same gel as the experimental one.
